# Supplementary material
Source: PubMed Central journal article supplement (PMC7124476)
Supplement: 156432_1_supp_455635_q3t27f.pdf [file 156432_1_supp_455635_q3t27f.pdf]

**Supplemental Data for:**

**Integrative metabolic pathway analysis reveals novel therapeutic targets in osteoarthritis**

Beatriz Rocha<sup>1</sup>, Berta Cillero-Pastor<sup>2</sup>, Gert Eijkel<sup>2</sup>, Valentina Calamia<sup>1</sup>, Patricia Fernández-Puente<sup>1</sup>, Martin R. L. Paine<sup>2</sup>, Cristina Ruiz-Romero<sup>1,3</sup>, Ron M. A. Heeren<sup>2</sup>, Francisco J. Blanco<sup>1,4\*</sup>

<sup>1</sup> Proteomics Group-ProteoRed/ISCIII, Grupo de Investigación de Reumatología (GIR), INIBIC – Hospital Universitario de A Coruña, A Coruña, Spain

<sup>2</sup> The Maastricht Multimodal Molecular Imaging Institute (M4I), Division of Imaging Mass Spectrometry, Maastricht University, The Netherlands

<sup>3</sup> CIBER-BBN Instituto de Salud Carlos III, INIBIC-CHUAC, A Coruña, Spain

<sup>4</sup> RIER-RED de Inflamación y Enfermedades Reumáticas, INIBIC-CHUAC, A Coruña, Spain

| <b>Supplemental Figures</b>                                                                                                                                                         | <b>Page</b> |
|-------------------------------------------------------------------------------------------------------------------------------------------------------------------------------------|-------------|
| <b>Figure S1.</b> MALDI-Orbitrap-MS/MS spectrum of the <i>m/z</i> 540.0533 ([ADP-ribose –H <sub>2</sub> O-H] <sup>-</sup> ) precursor ion.                                          | S-4         |
| <b>Figure S2.</b> SILAC-based quantitative proteomics.                                                                                                                              | S-5         |
| <b>Figure S3.</b> Predicted biological process of the differentially abundant proteins identified in the proteomic analysis.                                                        | S-6         |
| <b>Figure S4.</b> Schematic representation of metabolites presented a significant alteration of their levels in control hBMSCs due to chondrogenic differentiation.                 | S-7         |
| <b>Figure S5.</b> Spatial distribution and abundance of intermediate metabolites of glycolytic pathway in OA micromasses.                                                           | S-8         |
| <b>Figure S6.</b> PCA-DA analysis and altered metabolic pathways observed in OA and control hBMSCs at the undifferentiated stage (day 2).                                           | S-9         |
| <b>Figure S7.</b> Metabolic enrichment analysis demonstrated major impact in pentose phosphate pathway and Warburg effect.                                                          | S-10        |
| <b>Figure S8.</b> Spatial distribution and abundance of metabolites involved in pentose phosphate pathway in OA and control micromasses at the undifferentiated chondrogenic stage. | S-11        |
| <b>Figure S9.</b> Altered metabolism in OA hBMSCs undergoing chondrogenesis.                                                                                                        | S-12        |
| <br><b>Supplemental Tables</b>                                                                                                                                                      |             |
| <b>Table S1.</b> Overview of the clinical data of the OA patients and healthy control donors included in this study.                                                                | S-13        |
| <b>Table S2.</b> Metabolites detected in hBMSCs undergoing chondrogenesis with MALDI-FT-ICR-MSI in negative ion mode.                                                               | S-13        |
| <b>Table S3.</b> Targeted genes, primer details and PCR conditions used for quantitative Real-Time PCR.                                                                             | S-13        |
| <b>Table S4.</b> List of identified proteins in OA hBMSCs undergoing chondrogenesis after a SILAC-based proteomic analysis.                                                         | S-14        |
| <b>Table S5.</b> List of identified peptides in OA hBMSCs undergoing chondrogenesis after a SILAC-based proteomic analysis.                                                         | S-14        |

|                                                                                                                                                                                                          |      |
|----------------------------------------------------------------------------------------------------------------------------------------------------------------------------------------------------------|------|
| <b>Table S6.</b> Pathway analysis results of altered metabolic pathways involved in the chondrogenesis of control human bone marrow mesenchymal stem cells using MetaboAnalyst.                          | S-14 |
| <b>Table S7.</b> Pathway analysis results of altered metabolic pathways involved in the chondrogenesis of OA human bone marrow mesenchymal stem cells using MetaboAnalyst.                               | S-15 |
| <b>Table S8.</b> Integrated pathway analysis results of metabolites/proteins involved in the chondrogenesis of control human bone marrow mesenchymal stem cells using MetaboAnalyst.                     | S-16 |
| <b>Table S9.</b> Integrated pathway analysis results of metabolites/proteins involved in the chondrogenesis of OA human bone marrow mesenchymal stem cells using MetaboAnalyst.                          | S-17 |
| <b>Table S10.</b> Metabolites modulated at day 2 in OA human bone marrow mesenchymal stem cells undergoing chondrogenesis <i>versus</i> control cells detected by MALDI-FT-ICR-MSI in negative ion mode. | S-18 |
| <b>Table S11.</b> Pathway analysis results of altered metabolic pathways in control human bone marrow mesenchymal stem cells versus OA at day 2 of chondrogenesis using MetaboAnalyst.                   | S-20 |

## Supplementary Figures

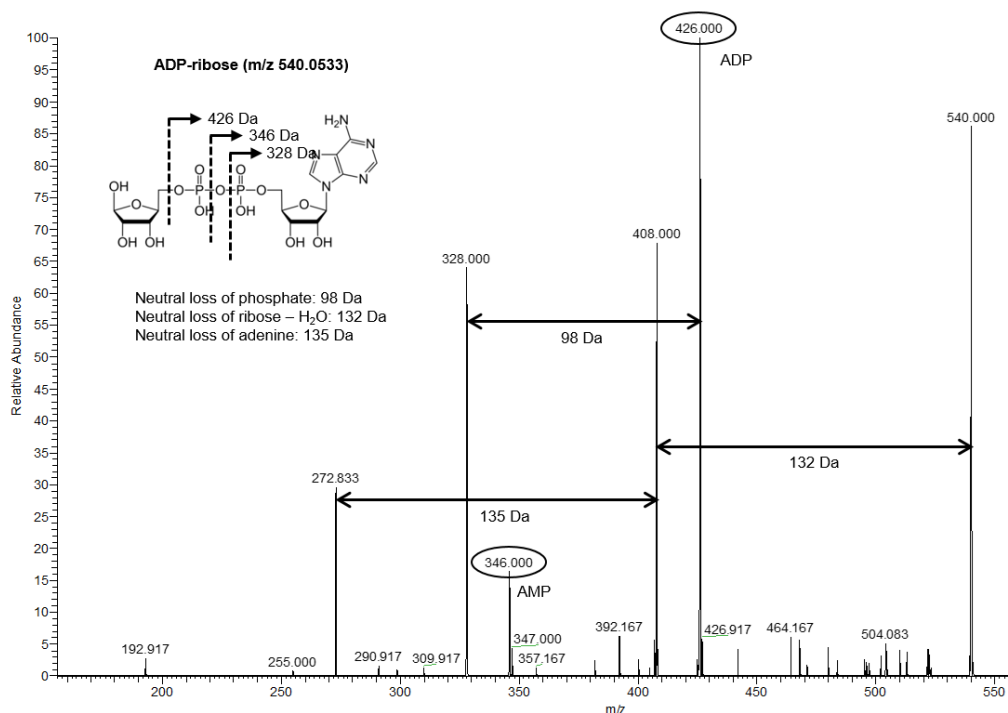

**Figure S1. MALDI-Orbitrap-MS/MS spectrum of the  $m/z$  540.0533 ([ADP-ribose -  $H_2O-H$ ] $^-$ ) precursor ion.** The mass peak of  $m/z$  426 confirms the presence of ADP, whereas the  $m/z$  132 fragment ion corresponds to the neutral loss of the ribose sugar minus water. Neutral loss of phosphate and adenine nitrogenous base was confirmed by the mass differences of 98 Da (between  $m/z$  426 and  $m/z$  328) and 135 Da (between  $m/z$  408 and  $m/z$  273), respectively. Thus, we can confidently assign the signal  $m/z$  540.0533 as adenine diphosphate-ribose (ADP-ribose).

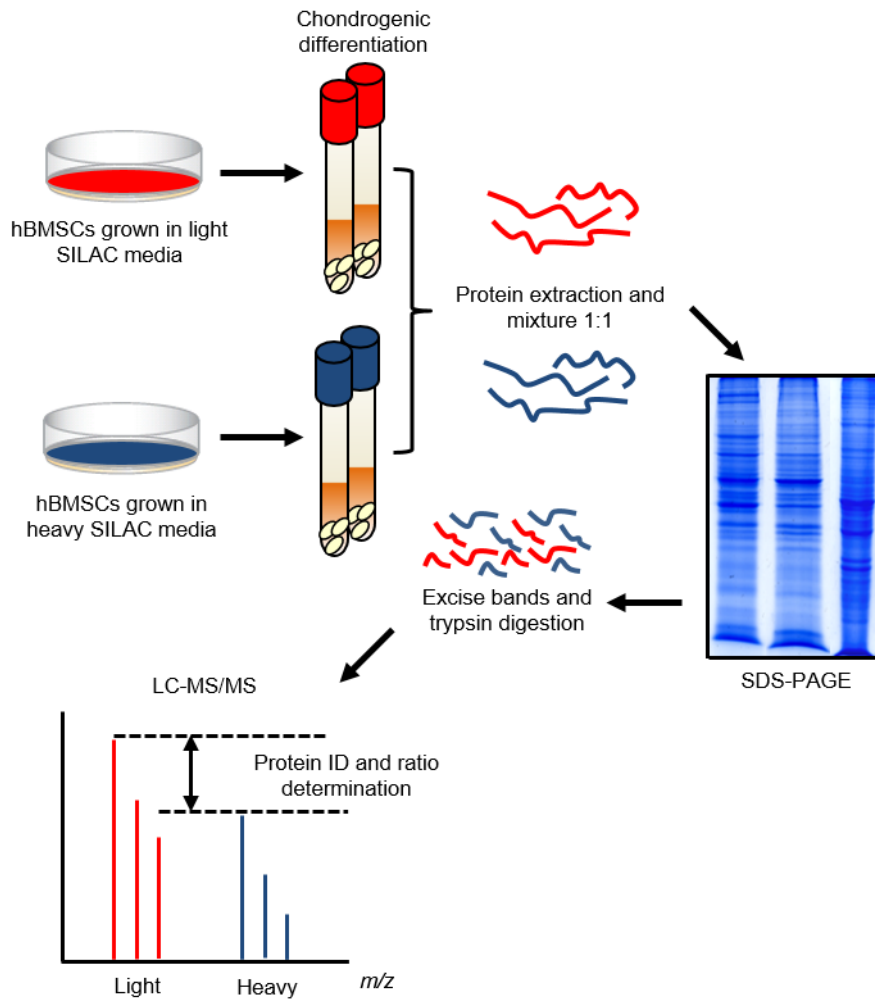

**Figure S2.** SILAC-based quantitative proteomics. Workflow of SILAC coupled with nanoLC-MS/MS for the comparative analysis of protein expression in OA hBMSCs after 2 and 14 days of chondrogenic differentiation.

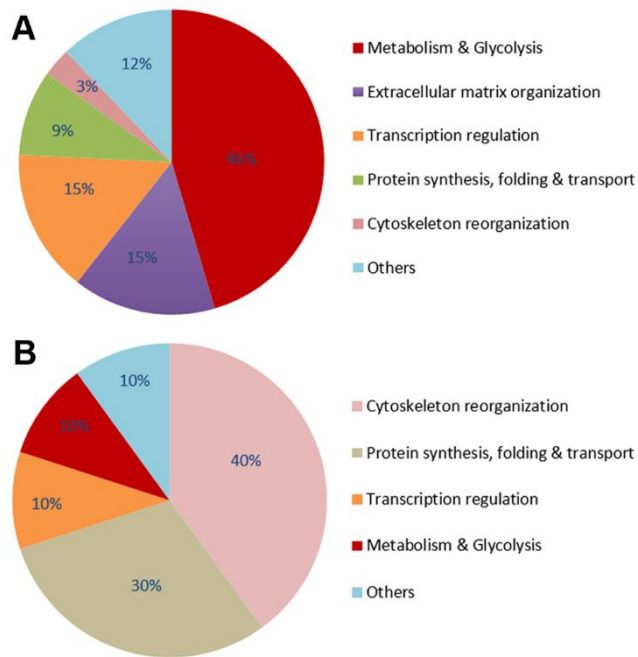

**Figure S3. Predicted biological process of the differentially abundant proteins identified in the proteomic analysis. A, B) Predicted biological process of the set of proteins increased (A) or decreased (B) at day 14, according to GO annotation.**

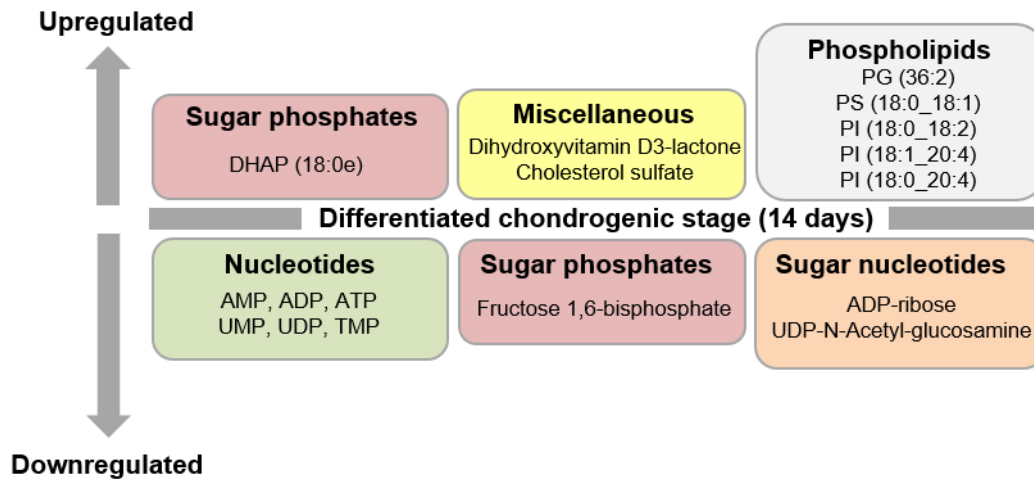

**Figure S4. Schematic representation of metabolites presented a significant alteration of their levels in control hBMSCs due to chondrogenic differentiation.** Levels of 17 metabolites, including phospholipids, were significantly altered between day 2 and 14 of chondrogenic differentiation. AMP, adenine monophosphate; ADP, adenine diphosphate; ATP, adenine triphosphate; UMP, uridine monophosphate; UDP, uridine diphosphate; TMP, thymidine monophosphate; DHAP, dihydroxyacetone phosphate; P, phosphate; PG, phosphatidylglycerol; PS, phosphatidylserine; PI, phosphatidylinositol.

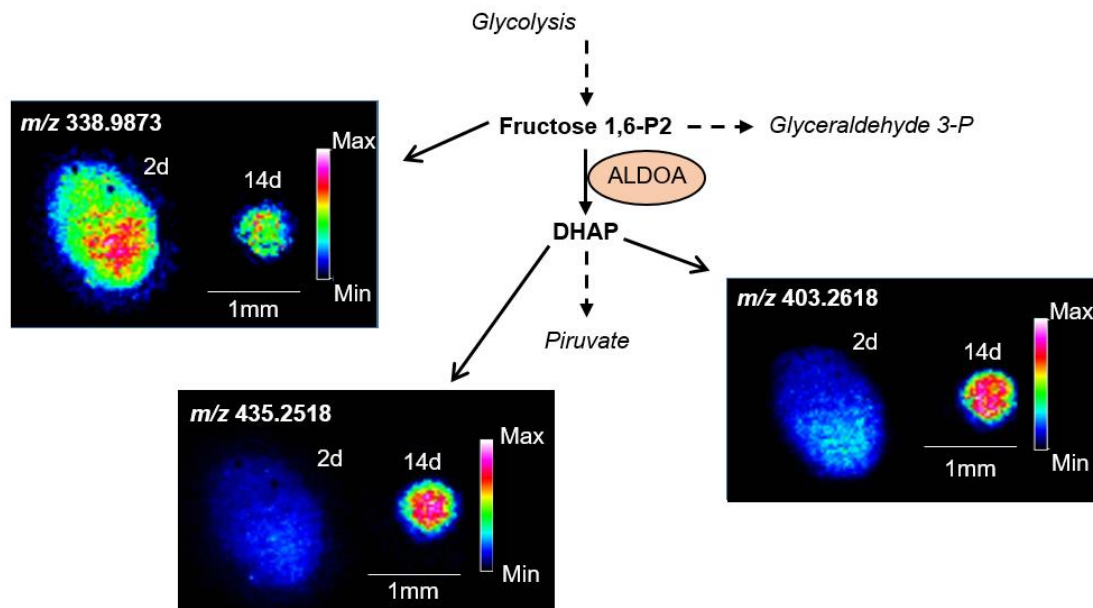

**Figure S5. Spatial distribution and abundance of intermediate metabolites of glycolytic pathway in OA micromasses.** Fructose 1,6-bisphosphate (Fru-1,6-P<sub>2</sub>) and dihydroxyacetone phosphate (DHAP) are two important intermediates in the glycolysis metabolic pathway. Fru-1,6-P<sub>2</sub> can be converted to DHAP by the action of the enzyme fructose-bisphosphate aldolase (ALDOA). The abundance of Fru-1,6-P<sub>2</sub> ( $m/z$  338.9874) was relatively higher in the micromasses collected at day 2, whereas DHAP ( $m/z$  403.2618 and  $m/z$  435.2518) were increased at day 14 and specifically localized in the core of the pellet.



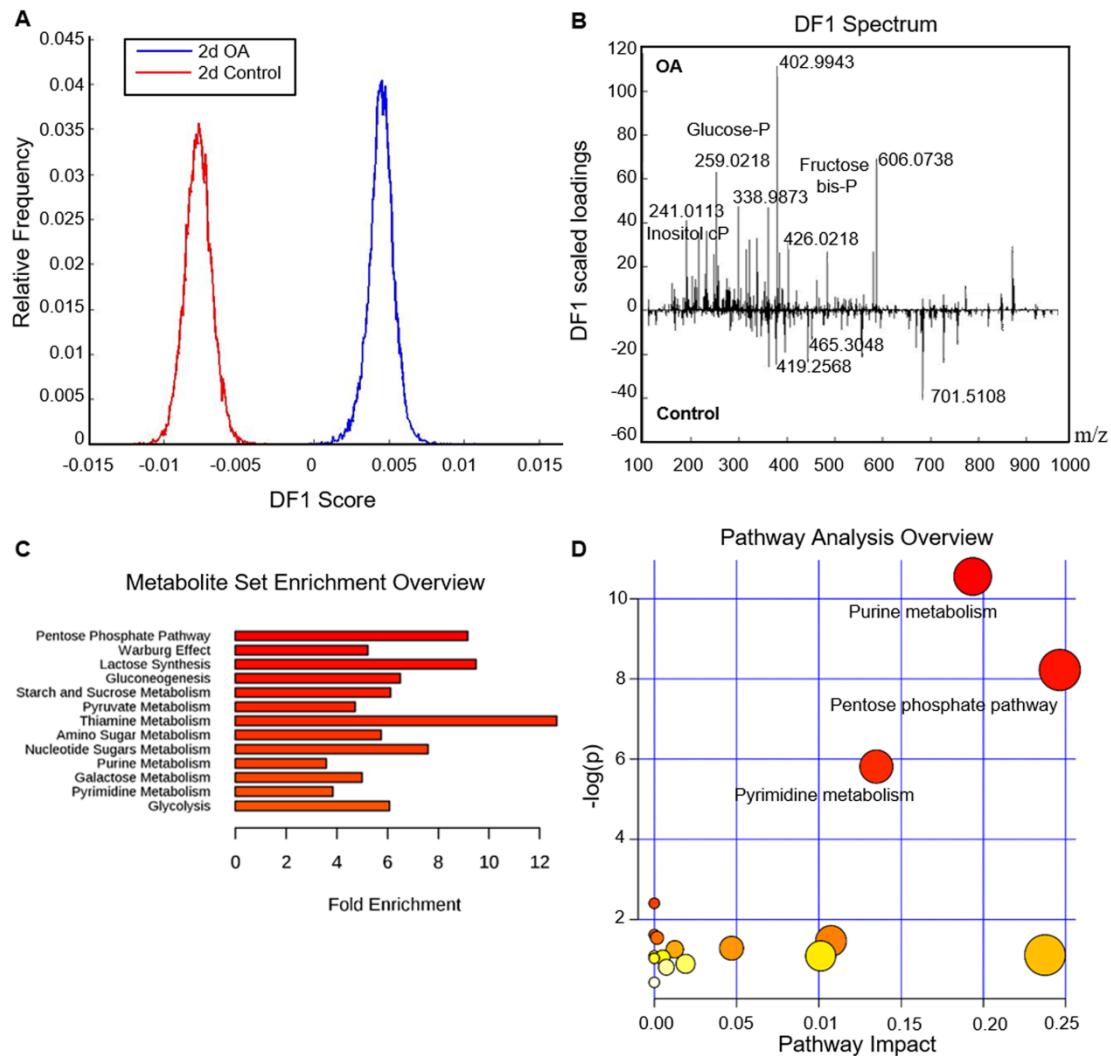

**Figure S6. PCA-DA analysis and altered metabolic pathways observed in OA and control hBMSCs at the undifferentiated stage (day 2).** **A**) Statistical analysis showing metabolic differences between undifferentiated OA vs. control hBMSCs. **B**, Discriminant function 1 (DF1) spectra loading plot showing the discriminating masses between control and OA hBMSCs at day 2 of chondrogenic differentiation. **C**, The top 13 significantly altered pathways ( $p$  value  $<0.05$ ) determined by metabolite set enrichment analysis (MSEA), ranked by raw  $p$  value calculated from the enrichment analysis. **D**, Metabolic pathway analysis overview. In D, all the matched pathways are represented by circles, with the circle size indicating pathway impact (arbitrary scale). Pathways in the top right

diagonal region indicates that metabolites involved in those pathways are significantly changed and these are more likely to have significant impacts on the pathways. The color of the circles indicates unadjusted  $p$  values (y axis) from pathway enrichment analysis, with red  $< 0.03$ ; orange  $< 0.29$ , and yellow  $< 0.36$ . The pathways are identified based on overrepresentation analysis (ORA), using the significantly altered metabolites. The x axis represents increasing metabolic pathway impact according to the degree of centrality from pathway topology analysis.

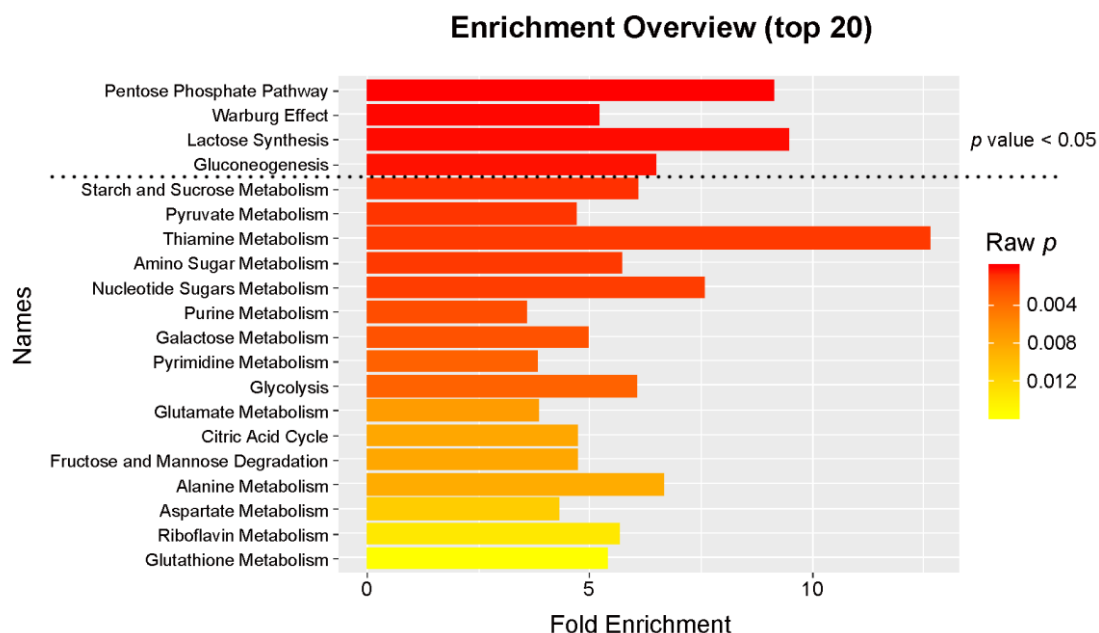

**Figure S7. Metabolic enrichment analysis demonstrated major impact in pentose phosphate pathway and Warburg effect.** The summary plot for metabolite set enrichment analysis (MSEA) ranks the metabolite sets according to  $p$  value with a dashed line indicating Holm  $p$  value threshold. The top twenty metabolite sets are shown.

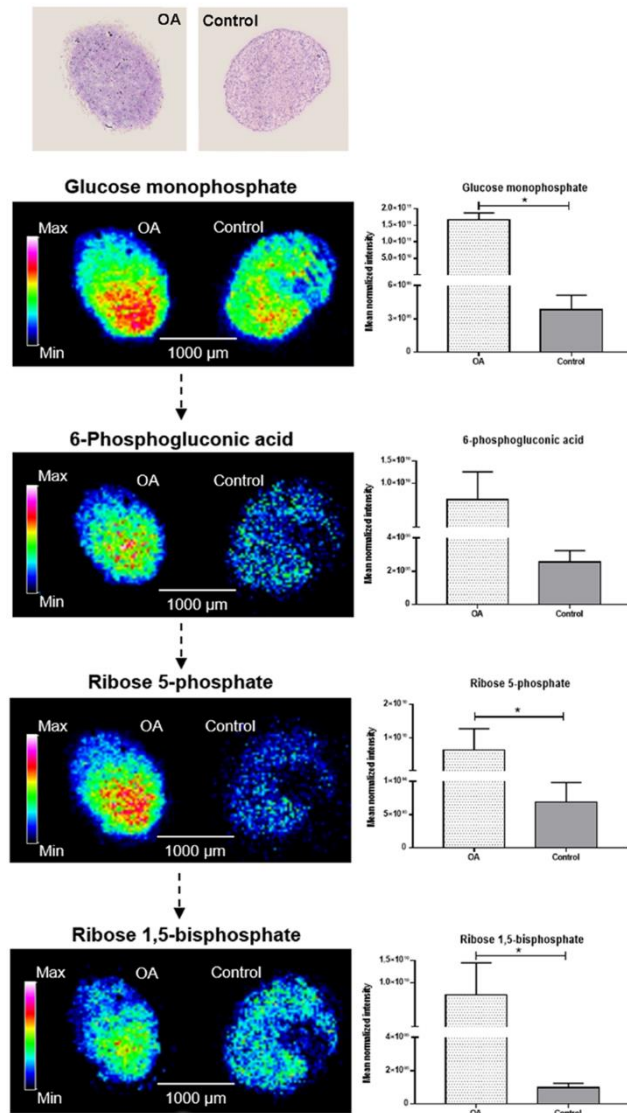

**Figure S8. Spatial distribution and abundance of metabolites involved in pentose phosphate pathway in OA and control micromasses at the undifferentiated chondrogenic stage.** Ribose-5-phosphate and Ribose-1,5-bisphosphate are localized in the core zone of OA micromasses according to molecular images and histology. Two sections of OA (n=5) and control (n=3) micromasses collected at day 2 were analyzed and compared. Graphs depict mean normalized intensity (arbitrary units) ± standard mean error (Mann-Whitney test) \**p* value <0.05, compared to control.

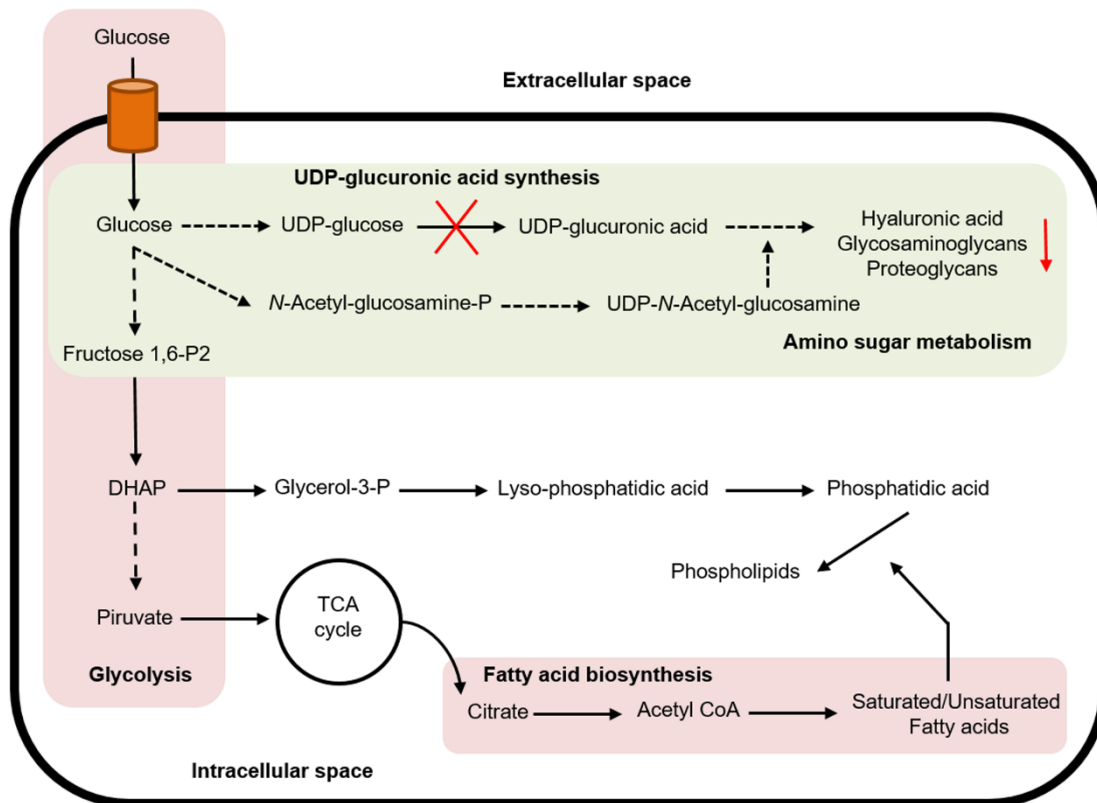

**Figure S9. Altered metabolism in OA hBMSCs undergoing chondrogenesis.** The glycolysis pathway and unsaturated fatty acid biosynthesis are upregulated in OA hBMSCs during chondrogenesis (pathways in red), whereas amino sugar metabolism and UDP-glucuronic acid synthesis are downregulated (pathways in green).

## Supplementary Tables

**Table S1.** Overview of the clinical data of the OA patients and healthy control donors included in this study.

| Patient diagnosis     | age range (mean $\pm$ sd) | weight range in kg (mean $\pm$ sd) | height range in cm (mean $\pm$ sd) | BMI range (mean $\pm$ sd) |
|-----------------------|---------------------------|------------------------------------|------------------------------------|---------------------------|
| Osteoarthritis (n=13) | 65-76 (71 $\pm$ 5,5)      | 53-97 (75,5 $\pm$ 20)              | 151-177 (162 $\pm$ 11,5)           | 20-36 (29 $\pm$ 6,7)      |
| Controls (n=11)       | 69-84 (76,5 $\pm$ 10,5)   | 52-82 (67,5 $\pm$ 21)              | 163-169 (166 $\pm$ 4)              | 20-29 (24 $\pm$ 6,5)      |

BMI: body mass index; sd: standard deviation

**Table S2.** Metabolites detected in hBMSCs undergoing chondrogenesis with MALDI-FT-ICR-MSI in negative ion mode. Provided separately as an excel file.

**Table S3.** Targeted genes, primer details and PCR conditions used for quantitative Real-Time PCR.

| Primers details |                        |                   |       |      |                      |  |
|-----------------|------------------------|-------------------|-------|------|----------------------|--|
| Gene            | Sequence (5' - 3')     | Melting Temp (°C) | Probe | GC%  | Amplicon Length (nt) |  |
| UGDH Fw         | GAATTTGCCAGAAGTAGCTCGT | 63.40             | #62   | 45.4 | 73                   |  |
| UGDH Rv         | AGCAAACCTCCTCCTCTGGT   | 64.10             |       | 55   |                      |  |
| UGP2 Fw         | CAAAATGCCATTGACATGGA   | 64.30             | #58   | 40   | 90                   |  |
| UGP2 Rv         | TTTGATGGCAGCCCCTACT    | 64.50             |       | 52.6 |                      |  |
| RPL13 Fw        | GGATAAGAAACCCTGCGACA   | 60                | #63   | 50   | 91                   |  |
| RPL13 Rv        | GCCTCGACCATCAAGCAC     | 60                |       | 61   |                      |  |

| RT-qPCR details |        |           |        |  |
|-----------------|--------|-----------|--------|--|
| Program         | Cycles | Temp (°C) | Time   |  |
| Pre-Incubation  | 1      | 95        | 10 min |  |
| Amplification   | 45     | 95        | 10 sec |  |
|                 |        | 60        | 30 sec |  |
|                 |        | 72        | 1 sec  |  |
| Cooling         | 1      | 40        | 20 sec |  |

**Table S4.** List of identified proteins in OA hBMSCs undergoing chondrogenesis after a SILAC-based proteomic analysis. Provided separately as an excel file.

**Table S5.** List of identified peptides in OA hBMSCs undergoing chondrogenesis after a SILAC-based proteomic analysis. Provided separately as an excel file.

**Table S6.** Pathway analysis results of altered metabolic pathways involved in the chondrogenesis of control human bone marrow mesenchymal stem cells using MetaboAnalyst.

|          | <b>Pathway name</b>                         | <b>Total <sup>a)</sup></b> | <b>Hits <sup>b)</sup></b> | <b>Raw p <sup>c)</sup></b> | <b>-log(p)</b> | <b>Holm p <sup>d)</sup></b> | <b>FDR <sup>e)</sup></b> | <b>Impact <sup>f)</sup></b> |
|----------|---------------------------------------------|----------------------------|---------------------------|----------------------------|----------------|-----------------------------|--------------------------|-----------------------------|
| <b>1</b> | Pyrimidine metabolism                       | 60                         | 3                         | 0,003                      | 5,892          | 0,218                       | 0,110                    | 0,141                       |
| <b>2</b> | Purine metabolism                           | 92                         | 4                         | 0,001                      | 7,153          | 0,062                       | 0,062                    | 0,127                       |
| <b>3</b> | Glycerophospholipid metabolism              | 39                         | 1                         | 0,178                      | 1,724          | 1,000                       | 1,000                    | 0,037                       |
| <b>4</b> | Amino sugar and nucleotide sugar metabolism | 88                         | 1                         | 0,361                      | 1,019          | 1,000                       | 1,000                    | 0,026                       |
| <b>5</b> | Nitrogen metabolism                         | 39                         | 1                         | 0,178                      | 1,724          | 1,000                       | 1,000                    | 0,000                       |
| <b>6</b> | Glycine, serine and threonine metabolism    | 48                         | 1                         | 0,215                      | 1,536          | 1,000                       | 1,000                    | 0,000                       |
| <b>7</b> | Steroid hormone biosynthesis                | 99                         | 1                         | 0,397                      | 0,925          | 1,000                       | 1,000                    | 0,000                       |

hBMSCs, human bone marrow mesenchymal stem cells

<sup>a)</sup> Total is the total number of compounds in the pathway.

<sup>b)</sup> Hits is the actually matched number of compounds from the user uploaded data.

<sup>c)</sup> Raw p is the original p value calculated from the enrichment analysis.

<sup>d)</sup> Holm p is the p value adjusted by Holm-Bonferroni method.

<sup>e)</sup> FDR is the p value adjusted using False Discovery Rate.

<sup>f)</sup> Impact is the pathway impact value calculated from pathway topology analysis.

**Table S7.** Pathway analysis results of altered metabolic pathways involved in the chondrogenesis of OA human bone marrow mesenchymal stem cells using MetaboAnalyst.

| Pathway name                                  | Total<br>a) | Hits<br>b) | Raw p<br>c) | $-\log(p)$ | Holm p <sup>d)</sup> | FDR<br>e) | Impact <sup>f)</sup> |
|-----------------------------------------------|-------------|------------|-------------|------------|----------------------|-----------|----------------------|
| 1 Pyrimidine metabolism                       | 60          | 6          | 0,000       | 10,213     | 0,003                | 0,003     | 0,185                |
| 2 Purine metabolism                           | 92          | 5          | 0,003       | 5,799      | 0,239                | 0,121     | 0,142                |
| 3 Galactose metabolism                        | 41          | 3          | 0,010       | 4,595      | 0,788                | 0,269     | 0,035                |
| 4 Amino sugar and nucleotide sugar metabolism | 88          | 4          | 0,015       | 4,175      | 1,000                | 0,278     | 0,288                |
| 5 Starch and sucrose metabolism               | 50          | 3          | 0,017       | 4,053      | 1,000                | 0,278     | 0,296                |
| 6 Glycolysis or Gluconeogenesis               | 31          | 2          | 0,046       | 3,076      | 1,000                | 0,559     | 0,047                |
| 7 Glycerolipid metabolism                     | 32          | 2          | 0,049       | 3,018      | 1,000                | 0,559     | 0,012                |
| 8 Glycerophospholipid metabolism              | 39          | 2          | 0,070       | 2,665      | 1,000                | 0,696     | 0,175                |
| 9 Fatty acid biosynthesis                     | 49          | 2          | 0,103       | 2,270      | 1,000                | 0,918     | 0,000                |
| 10 Pentose and glucuronate interconversions   | 53          | 2          | 0,118       | 2,139      | 1,000                | 0,942     | 0,006                |
| 11 Pentose phosphate pathway                  | 32          | 1          | 0,305       | 1,189      | 1,000                | 1,000     | 0,012                |
| 12 Glutathione metabolism                     | 38          | 1          | 0,351       | 1,048      | 1,000                | 1,000     | 0,237                |
| 13 Inositol phosphate metabolism              | 39          | 1          | 0,358       | 1,027      | 1,000                | 1,000     | 0,000                |
| 14 Nitrogen metabolism                        | 39          | 1          | 0,358       | 1,027      | 1,000                | 1,000     | 0,000                |
| 15 Ascorbate and aldarate metabolism          | 45          | 1          | 0,401       | 0,914      | 1,000                | 1,000     | 0,000                |
| 16 Cysteine and methionine metabolism         | 56          | 1          | 0,472       | 0,750      | 1,000                | 1,000     | 0,007                |
| 17 Arachidonic acid metabolism                | 62          | 1          | 0,508       | 0,678      | 1,000                | 1,000     | 0,217                |

OA hBMSCs, osteoarthritis human bone marrow mesenchymal stem cells

a) Total is the total number of compounds in the pathway.

b) Hits is the actually matched number of compounds from the user uploaded data.

c) Raw p is the original p value calculated from the enrichment analysis.

d) Holm p is the p value adjusted by Holm-Bonferroni method.

e) FDR is the p value adjusted using False Discovery Rate.

f) Impact is the pathway impact value calculated from pathway topology analysis.

**Table S8.** Integrated pathway analysis results of metabolites/proteins involved in the chondrogenesis of control human bone marrow mesenchymal stem cells using MetaboAnalyst.

| Pathway name                                           | Total <sup>a)</sup> | Hits <sup>b)</sup> | Raw p <sup>c)</sup> | Topology <sup>d)</sup> |
|--------------------------------------------------------|---------------------|--------------------|---------------------|------------------------|
| <b>1 Glycolysis / Gluconeogenesis</b>                  | 91                  | 6                  | 0,003               | 0,407                  |
| <b>2 Galactose metabolism</b>                          | 55                  | 2                  | 0,246               | 0,143                  |
| <b>3 Fructose and mannose metabolism</b>               | 55                  | 2                  | 0,246               | 0,216                  |
| <b>4 Pyruvate metabolism</b>                           | 64                  | 2                  | 0,305               | 0,174                  |
| <b>5 Starch and sucrose metabolism</b>                 | 78                  | 2                  | 0,395               | 0,148                  |
| <b>6 Phenylalanine metabolism</b>                      | 29                  | 1                  | 0,400               | 0,091                  |
| <b>7 Pyrimidine metabolism</b>                         | 142                 | 3                  | 0,452               | 0,239                  |
| <b>8 Nicotinate and nicotinamide metabolism</b>        | 39                  | 1                  | 0,499               | 0,054                  |
| <b>9 Pentose phosphate pathway</b>                     | 48                  | 1                  | 0,574               | 0,390                  |
| <b>10 Purine metabolism</b>                            | 234                 | 4                  | 0,597               | 0,230                  |
| <b>11 Propanoate metabolism</b>                        | 52                  | 1                  | 0,603               | 0,049                  |
| <b>12 Pentose and glucuronate interconversions</b>     | 52                  | 1                  | 0,603               | 0,276                  |
| <b>13 Cysteine and methionine metabolism</b>           | 63                  | 1                  | 0,675               | 0,036                  |
| <b>14 Glycine, serine and threonine metabolism</b>     | 68                  | 1                  | 0,704               | 0,032                  |
| <b>15 Glycerolipid metabolism</b>                      | 72                  | 1                  | 0,725               | 0,162                  |
| <b>16 Glutathione metabolism</b>                       | 75                  | 1                  | 0,740               | 0,113                  |
| <b>17 Amino sugar and nucleotide sugar metabolism</b>  | 84                  | 1                  | 0,780               | 0,025                  |
| <b>18 Inositol phosphate metabolism</b>                | 90                  | 1                  | 0,803               | 0,031                  |
| <b>19 Arachidonic acid metabolism</b>                  | 100                 | 1                  | 0,837               | 0,051                  |
| <b>20 Glycerophospholipid metabolism</b>               | 119                 | 1                  | 0,886               | 0,053                  |
| <b>21 Steroid hormone biosynthesis</b>                 | 137                 | 1                  | 0,919               | 0,011                  |
| <b>22 Metabolism of xenobiotics by cytochrome P450</b> | 139                 | 1                  | 0,922               | 0,018                  |

hBMSCs, human bone marrow mesenchymal stem cells

<sup>a)</sup> Total is the total number of compounds in the pathway.

<sup>b)</sup> Hits is the actually matched number of compounds from the user uploaded data.

<sup>c)</sup> Raw p is the original p value calculated from the enrichment analysis.

<sup>d)</sup> Topology analysis score.



**Table S9.** Integrated pathway analysis results of metabolites/proteins involved in the chondrogenesis of OA human bone marrow mesenchymal stem cells using MetaboAnalyst.

|           | <b>Pathway name</b>                                | <b>Total <sup>a)</sup></b> | <b>Hits <sup>b)</sup></b> | <b>Raw p <sup>c)</sup></b> | <b>Topology <sup>d)</sup></b> |
|-----------|----------------------------------------------------|----------------------------|---------------------------|----------------------------|-------------------------------|
| <b>1</b>  | <b>Glycolysis / Gluconeogenesis</b>                | 91                         | 8                         | 0,002                      | 0,542                         |
| <b>2</b>  | <b>Pentose and glucuronate interconversions</b>    | 52                         | 5                         | 0,009                      | 0,621                         |
| <b>3</b>  | <b>Galactose metabolism</b>                        | 55                         | 5                         | 0,012                      | 0,571                         |
| <b>4</b>  | <b>Starch and sucrose metabolism</b>               | 78                         | 6                         | 0,013                      | 0,463                         |
| <b>5</b>  | <b>Amino sugar and nucleotide sugar metabolism</b> | 84                         | 6                         | 0,018                      | 0,457                         |
| <b>6</b>  | <b>Biosynthesis of unsaturated fatty acids</b>     | 27                         | 3                         | 0,031                      | 0,094                         |
| <b>7</b>  | Pentose phosphate pathway                          | 48                         | 3                         | 0,125                      | 0,683                         |
| <b>8</b>  | Pyruvate metabolism                                | 64                         | 3                         | 0,229                      | 0,174                         |
| <b>9</b>  | Ascorbate and aldarate metabolism                  | 35                         | 2                         | 0,230                      | 0,250                         |
| <b>10</b> | Pyrimidine metabolism                              | 142                        | 5                         | 0,305                      | 0,398                         |
| <b>11</b> | Fatty acid biosynthesis                            | 49                         | 2                         | 0,366                      | 0,022                         |
| <b>12</b> | Propanoate metabolism                              | 52                         | 2                         | 0,394                      | 0,049                         |
| <b>13</b> | Fructose and mannose metabolism                    | 55                         | 2                         | 0,422                      | 0,216                         |
| <b>14</b> | Cysteine and methionine metabolism                 | 63                         | 2                         | 0,494                      | 0,036                         |
| <b>15</b> | Phenylalanine metabolism                           | 29                         | 1                         | 0,537                      | 0,091                         |
| <b>16</b> | Glycerolipid metabolism                            | 72                         | 2                         | 0,567                      | 0,243                         |
| <b>17</b> | Glutathione metabolism                             | 75                         | 2                         | 0,590                      | 0,264                         |
| <b>18</b> | Nicotinate and nicotinamide metabolism             | 39                         | 1                         | 0,647                      | 0,108                         |
| <b>19</b> | Inositol phosphate metabolism                      | 90                         | 2                         | 0,691                      | 0,047                         |
| <b>20</b> | Purine metabolism                                  | 234                        | 5                         | 0,753                      | 0,310                         |
| <b>21</b> | Glycerophospholipid metabolism                     | 119                        | 2                         | 0,830                      | 0,107                         |
| <b>22</b> | Glycine, serine and threonine metabolism           | 68                         | 1                         | 0,840                      | 0,032                         |
| <b>23</b> | Arachidonic acid metabolism                        | 100                        | 1                         | 0,935                      | 0,244                         |

OA hBMSCs, osteoarthritis human bone marrow mesenchymal stem cells

<sup>a)</sup> Total is the total number of compounds in the pathway.

<sup>b)</sup> Hits is the actually matched number of compounds from the user uploaded data.

<sup>c)</sup> Raw p is the original p value calculated from the enrichment analysis.

<sup>d)</sup> Topology analysis score.

**Table S10.** Metabolites modulated at day 2 in OA human bone marrow mesenchymal stem cells undergoing chondrogenesis *versus* control cells detected by MALDI-FT-ICR-MSI in negative ion mode.

| Metabolite assignment <sup>a)</sup>      | Parent ion <sup>b)</sup>            | Experimental <i>m/z</i> |
|------------------------------------------|-------------------------------------|-------------------------|
| <b><i>Upregulated at day 2 in OA</i></b> |                                     |                         |
| <b>Fatty acids</b>                       |                                     |                         |
| Oleic acid                               | [M-H] <sup>-</sup>                  | 281,2483                |
| Stearic acid                             | [M-H] <sup>-</sup>                  | 283,2643                |
| <b>Nucleotides</b>                       |                                     |                         |
| Adenosine monophosphate (AMP)            | [M-H] <sup>-</sup>                  | 346,0563                |
| Adenosine diphosphate (ADP)              | [M-H] <sup>-</sup>                  | 426,0218                |
| Adenosine diphosphate (ADP)              | [M-H <sub>2</sub> O-H] <sup>-</sup> | 408,0113                |
| Adenosine triphosphate (ATP)             | [M-H] <sup>-</sup>                  | 505,9878                |
| Adenosine triphosphate (ATP)             | [M-H <sub>2</sub> O-H] <sup>-</sup> | 487,9778                |
| Cytidine diphosphate (CDP)               | [M-H] <sup>-</sup>                  | 402,0098                |
| Guanosine monophosphate (GMP)            | [M-H] <sup>-</sup>                  | 362,0503                |
| Guanosine diphosphate (GDP)              | [M-H] <sup>-</sup>                  | 442,0163                |
| Guanosine triphosphate (GTP)             | [M-H] <sup>-</sup>                  | 521,9828                |
| Uridine monophosphate (UMP)              | [M-H] <sup>-</sup>                  | 323,0283                |
| Uridine monophosphate (UMP)              | [M-H <sub>2</sub> O-H] <sup>-</sup> | 305,0173                |
| Uridine diphosphate (UDP)                | [M-H <sub>2</sub> O-H] <sup>-</sup> | 384,9838                |
| Uridine triphosphate (UTP)               | [M-H] <sup>-</sup>                  | 482,9603                |
| <b>Sugar nucleotides</b>                 |                                     |                         |
| UDP- <i>N</i> -Acetyl-glucosamine        | [M-H] <sup>-</sup>                  | 606,0738                |
| <b>Sugar phosphates</b>                  |                                     |                         |
| Glucose monophosphate                    | [M-H] <sup>-</sup>                  | 259,0218                |
| <i>N</i> -Acetyl-glucosamine-phosphate   | [M-H <sub>2</sub> O-H] <sup>-</sup> | 282,0378                |
| <i>N</i> -Acetyl-glucosamine-phosphate   | [M-H] <sup>-</sup>                  | 300,0478                |
| Fructose 1,6-bisphosphate                | [M-H] <sup>-</sup>                  | 338,9874                |
| Ribose 5-phosphate                       | [M-H <sub>2</sub> O-H] <sup>-</sup> | 211,0003                |
| Ribose 1,5-bisphosphate                  | [M-H <sub>2</sub> O-H] <sup>-</sup> | 290,9668                |
| 6-Phosphogluconic acid                   | [M-H] <sup>-</sup>                  | 275,0163                |
| <b>Inositol-related</b>                  |                                     |                         |
| Inositol cyclic phosphate                | [M-H] <sup>-</sup>                  | 241,0113                |
| 1-(sn-Glycero-3-phospho)-1D-myo-inositol | [M-H <sub>2</sub> O-H] <sup>-</sup> | 315,0483                |
| Stearoylglycerophosphoinositol           | [M-H] <sup>-</sup>                  | 599,3213                |

| <b>PA-related</b>                   |                                     |          |
|-------------------------------------|-------------------------------------|----------|
| LysoPA(P-16:0e)                     | [M-H <sub>2</sub> O-H] <sup>-</sup> | 375,2303 |
| <b>Miscellaneous</b>                |                                     |          |
| PPPi                                | [M-H <sub>2</sub> O-H] <sup>-</sup> | 238,8903 |
| Cytidine                            | [M-H] <sup>-</sup>                  | 242,0793 |
| Glutathione                         | [M-H] <sup>-</sup>                  | 306,0763 |
| <i>Downregulated at day 2 in OA</i> |                                     |          |
| <b>PA-related</b>                   |                                     |          |
| CPA (18:0)                          | [M-H] <sup>-</sup>                  | 419,2568 |
| LysoPA(18:0)                        | [M-H] <sup>-</sup>                  | 437,2673 |
| PA (16:0_18:1)                      | [M-H] <sup>-</sup>                  | 673,4793 |
| PA (18:1_18:2)                      | [M-H] <sup>-</sup>                  | 699,4993 |
| <b>Miscellaneous</b>                |                                     |          |
| NNAL-N-glucuronide                  | [M-H] <sup>-</sup>                  | 384,1433 |
| Cholesterol sulfate                 | [M-H] <sup>-</sup>                  | 465,3048 |

CPA, cyclic phosphatidic acid; LysoPA, lysophosphatidic acid; PA, phosphatidic acid.

<sup>a)</sup> Assignments of  $m/z$  values according to tandem MS analysis and high mass accuracy.

<sup>b)</sup> Adduct ions: deprotonated ions [M-H]<sup>-</sup> and deprotonated ions with loss of water [M-H<sub>2</sub>O-H]<sup>-</sup>.

**Table S11.** Pathway analysis results of altered metabolic pathways in control human bone marrow mesenchymal stem cells versus OA at day 2 of chondrogenesis using MetaboAnalyst.

|           | Pathway name                                | Total<br>a) | Hits<br>b) | Raw p<br>c) | -log(p) | Holm p <sup>d)</sup> | FDR<br>e) | Impact <sup>f)</sup> |
|-----------|---------------------------------------------|-------------|------------|-------------|---------|----------------------|-----------|----------------------|
| <b>1</b>  | <b>Purine metabolism</b>                    | 92          | 7          | 0,000       | 10,558  | 0,002                | 0,002     | 0,193                |
| <b>2</b>  | <b>Pentose phosphate pathway</b>            | 32          | 4          | 0,000       | 8,225   | 0,021                | 0,011     | 0,246                |
| <b>3</b>  | Pyrimidine metabolism                       | 60          | 4          | 0,003       | 5,815   | 0,233                | 0,080     | 0,135                |
| <b>4</b>  | Fatty acid biosynthesis                     | 49          | 2          | 0,091       | 2,402   | 1,000                | 1,000     | 0,000                |
| <b>5</b>  | Riboflavin metabolism                       | 21          | 1          | 0,198       | 1,621   | 1,000                | 1,000     | 0,000                |
| <b>6</b>  | Ether lipid metabolism                      | 23          | 1          | 0,214       | 1,540   | 1,000                | 1,000     | 0,002                |
| <b>7</b>  | Amino sugar and nucleotide sugar metabolism | 88          | 2          | 0,232       | 1,462   | 1,000                | 1,000     | 0,107                |
| <b>8</b>  | Glycolysis or Gluconeogenesis               | 31          | 1          | 0,278       | 1,280   | 1,000                | 1,000     | 0,047                |
| <b>9</b>  | Glycerolipid metabolism                     | 32          | 1          | 0,286       | 1,253   | 1,000                | 1,000     | 0,012                |
| <b>10</b> | Glutathione metabolism                      | 38          | 1          | 0,330       | 1,110   | 1,000                | 1,000     | 0,237                |
| <b>11</b> | Nitrogen metabolism                         | 39          | 1          | 0,337       | 1,089   | 1,000                | 1,000     | 0,000                |
| <b>12</b> | Glycerophospholipid metabolism              | 39          | 1          | 0,337       | 1,089   | 1,000                | 1,000     | 0,101                |
| <b>13</b> | Galactose metabolism                        | 41          | 1          | 0,351       | 1,048   | 1,000                | 1,000     | 0,005                |
| <b>14</b> | Folate biosynthesis                         | 42          | 1          | 0,357       | 1,029   | 1,000                | 1,000     | 0,000                |
| <b>15</b> | Starch and sucrose metabolism               | 50          | 1          | 0,410       | 0,892   | 1,000                | 1,000     | 0,019                |
| <b>16</b> | Cysteine and methionine metabolism          | 56          | 1          | 0,447       | 0,806   | 1,000                | 1,000     | 0,007                |
| <b>17</b> | Steroid hormone biosynthesis                | 99          | 1          | 0,652       | 0,428   | 1,000                | 1,000     | 0,000                |

a) Total is the total number of compounds in the pathway.

b) Hits is the actually matched number of compounds from the user uploaded data.

c) Raw p is the original p value calculated from the enrichment analysis.

d) Holm p is the p value adjusted by Holm-Bonferroni method.

e) FDR is the p value adjusted using False Discovery Rate.

f) Impact is the pathway impact value calculated from pathway topology analysis.
